# Supplementary material for: Calibration of Hydroxyacetonitrile (HOCH 2 CN) and Methyl isocyanate (CH 3 NCO) Isomers using I - Chemical Ionization Mass Spectrometry (CIMS)
Source: Copernicus journal article supplement (doi:10.5194/amt-2024-94), 2024-06-21
Supplement: Supplementary file [file amt-2024-94-AC2-supplement.pdf]

Response to Delphine Farmer review of:

“Calibration of Hydroxyacetonitrile (HOCH<sub>2</sub>CN) and Methyl isocyanate (CH<sub>3</sub>NCO) Isomers using I<sup>-</sup> Chemical Ionization Mass Spectrometry (CIMS)”, Finewax, Chattopadhyay, Neuman, Roberts, and Burkholder

Atmos. Meas. Tech. Discuss., <https://doi.org/10.5194/amt-2024-94>, 2024

The authors thank the reviewer for their careful reading and constructive comments regarding our manuscript.

#### **Reviewer Comment:**

The reviewers concerned with wording in the following abstract sentence “These results contradict several recent field studies that have reported the detection of MIC using I-CIMS instruments.”, which was interpreted to imply a controversy.

#### **Author Response:**

It was not our intention to imply a controversy as the results from our study are definitive in that I-CIMS instruments are not sensitive to MIC and, therefore, previous studies have misattributed the observed C<sub>2</sub>H<sub>3</sub>NO I-CIMS signal to MIC.

#### **Action to be taken:**

Revise the abstract text “These results contradict several recent field studies that have reported the detection of MIC using I-CIMS instruments. This study demonstrates that HAN, rather than MIC, was most likely the C<sub>2</sub>H<sub>3</sub>NO isomer observed in those field studies, although the source chemistry for HAN remains uncharacterized.”

as follows:

“~~These~~ ~~The present~~ results ~~contradict~~ ~~show that~~ several recent field studies ~~that have reported the detection of MIC~~ using I-CIMS instrument detection ~~have misattributed the C<sub>2</sub>H<sub>3</sub>NO signal to MIC~~. This study ~~demonstrates~~ ~~proposes~~ that HAN, rather than MIC, was most likely the C<sub>2</sub>H<sub>3</sub>NO isomer observed in those field studies, although the source chemistry for HAN remains uncharacterized. ~~This study demonstrates the importance of applying absolute calibration standards in the identification and quantification of isomeric compounds.~~”

#### **Reviewer Comment:**

I encourage the authors to consider this question - what makes I-CIMS so sensitive to hydroxyacetonitrile, and not to methyl isocyanate?

#### **Author Response:**

We did not provide an explanation for the difference in sensitivity between the MIC and HAN isomers in our original submission. Reviewer #2 has provided an explanation in their review, which we agree with. We will add text and citation to two references that addresses this point

#### **Action to be taken:**

We have added text and citation to two references in the conclusion section as follows: ~~Iyer et al, (2016) and Hyttinen et al, (2018) provide an explanation for the significant difference in the I-CIMS sensitivity for MIC (CH<sub>3</sub>NCO) and HAN (HOCH<sub>2</sub>CN), due to the stability of I- cluster binding energies. That is, the H-bonding with the HO group in HAN leads to a stable I- cluster, while MIC would not form a stable I- cluster.~~

Hyttinen, N., Otkjaer, R. V., Iyer, S., Kjaergaard, H. G., Rissanen, M. P., Wennberg, P. O., and Kurten, T.: Computational comparison of different reagent ions in the chemical ionization of oxidized multifunctional compounds, *J. Phys. Chem. A*, 122, 269-279, <https://doi.org/10.1021/acs.jpca.7b10015>, 2018.

Iyer, S., Lopez-Hilfiker, F., Lee, B. H., Thornton, J. A., and Kurten, T.: Modeling the detection of organic and inorganic compounds using iodide-based chemical ionization, *J. Phys. Chem. A*, 120, 576-587, <https://doi.org/10.1021/acs.jpca.5b09837>, 2016.
